# Supplementary material
Source: publisher figshare collection journal article supplement (https://geolsoc.figshare.com/ndownloader/files/13392398)
Supplement: Supplementary file 1 [file 13392398]

## Sheet: PlotDat5
Source sheet	Sheet1	1.14446	0.12196	0	0	0.217708	0.0315113	1.18674	0.123786	1.49508	0.153143	1.33832	0.136	0.946262	0.10152	1.36892	0.140657	0.982628	0.107353	1.18739	0.12372	1.16869	0.120926	1.32946	0.133643	1.55959	0.153426	1.14758	0.11789	1.39838	0.139982	0.577052	0.0707148	1.29869	0.131753	1.13977	0.120629	1.01908	0.108178	1.5029	0.152851	1.19533	0.12404	1.31206	0.134093	1.53017	0.152553	1.39581	0.140353
Plot name	Concordia2	1.44896	0.15095	0.100326	0.0151731	0.482812	0.0640155	1.18591	0.124166	1.49417	0.153598	1.33713	0.136454	0.945535	0.101836	1.36818	0.141065	0.982089	0.107663	1.18674	0.124079	1.16781	0.121304	1.32842	0.134068	1.55825	0.153938	1.14623	0.118332	1.39734	0.140423	0.576475	0.0709489	1.29769	0.132172	1.13908	0.120986	1.01825	0.108523	1.50191	0.153317	1.19468	0.124401	1.31104	0.13452	1.52926	0.153008	1.39485	0.140786
Plot Type	1	1.27764	0.13382	0.210717	0.0305763	0.805631	0.097544	1.18349	0.124461	1.49152	0.153952	1.33366	0.136807	0.943412	0.102082	1.36604	0.141382	0.980529	0.107903	1.18488	0.124357	1.16526	0.121597	1.32539	0.134398	1.55431	0.154335	1.14226	0.118675	1.39428	0.140766	0.574788	0.0711307	1.29475	0.132497	1.13706	0.121263	1.01584	0.108791	1.49902	0.153679	1.19281	0.124681	1.30808	0.134851	1.52661	0.153362	1.39202	0.141122
1st free col	145	0.90919	0.1	0.332184	0.0462133	1.19873	0.132129	1.17957	0.12466	1.48724	0.15419	1.32804	0.137044	0.939974	0.102247	1.36258	0.141595	0.97801	0.108064	1.18186	0.124545	1.16113	0.121795	1.32047	0.13462	1.54793	0.154603	1.13581	0.118907	1.38932	0.140997	0.572055	0.0712534	1.28998	0.132717	1.13379	0.12145	1.01194	0.108971	1.49435	0.153923	1.18977	0.124869	1.30328	0.135075	1.52232	0.1536	1.38745	0.141349
Sigma Level	1	1.33167	0.13869	0.465836	0.0620876	1.67741	0.167804	1.17429	0.124755	1.48148	0.154304	1.32048	0.137158	0.935352	0.102326	1.35793	0.141696	0.974626	0.108141	1.17781	0.124634	1.15557	0.12189	1.31386	0.134727	1.53936	0.154731	1.12714	0.119018	1.38266	0.141108	0.568381	0.0713121	1.28358	0.132822	1.1294	0.121539	1.00669	0.109058	1.48807	0.154039	1.18569	0.124959	1.29684	0.135182	1.51656	0.153714	1.38131	0.141457
Absolute Errs	TRUE	0.95554	0.10586	0.612898	0.0782027	2.2603	0.204603	1.16787	0.124742	1.47448	0.154289	1.31127	0.137144	0.929726	0.102316	1.35227	0.141682	0.97051	0.108131	1.17288	0.124622	1.14881	0.121877	1.30581	0.134713	1.52891	0.154715	1.11658	0.119004	1.37454	0.141094	0.563908	0.0713046	1.27578	0.132808	1.12406	0.121527	1.0003	0.109047	1.48042	0.154024	1.18073	0.124947	1.28898	0.135168	1.50954	0.153699	1.37384	0.141443
Symbol Type	1	1.15495	0.12199	0.774713	0.0945623	2.97009	0.242562	1.16056	0.124623	1.4665	0.154145	1.30078	0.137002	0.92331	0.102217	1.34581	0.141554	0.965818	0.108033	1.16726	0.124508	1.1411	0.121759	1.29663	0.13458	1.517	0.154555	1.10454	0.118866	1.36529	0.140955	0.558806	0.0712313	1.26689	0.132677	1.11798	0.121414	0.993007	0.108939	1.4717	0.153877	1.17507	0.124833	1.28003	0.135034	1.50155	0.153555	1.36531	0.141307
Inverse Plot	FALSE	1.12413	0.11911	0.952763	0.11117	3.83441	0.281716	1.15262	0.124401	1.45784	0.153879	1.28939	0.136738	0.916351	0.102033	1.33882	0.141315	0.960731	0.107851	1.16117	0.124298	1.13274	0.121539	1.28668	0.134332	1.50408	0.154257	1.09148	0.118609	1.35525	0.140698	0.553273	0.0710948	1.25725	0.132433	1.11137	0.121205	0.985102	0.108738	1.46224	0.153605	1.16894	0.124621	1.27032	0.134785	1.49288	0.153289	1.35607	0.141055
Color Plot	TRUE	1.27642	0.1316	1.14868	0.12803	4.8869	0.322105	1.14437	0.124086	1.44884	0.1535	1.27755	0.136361	0.909117	0.10177	1.33155	0.140975	0.955444	0.107593	1.15484	0.123999	1.12404	0.121225	1.27633	0.13398	1.49065	0.153833	1.07789	0.118243	1.34482	0.140331	0.54752	0.0709006	1.24723	0.132085	1.10451	0.120908	0.976884	0.108451	1.45241	0.153218	1.16256	0.124321	1.26023	0.134431	1.48387	0.15291	1.34646	0.140695
3D plot	FALSE	1.49075	0.15097	1.36424	0.145146	6.16853	0.363766	1.13612	0.123689	1.43984	0.153023	1.26571	0.135887	0.901887	0.101439	1.32428	0.140547	0.950162	0.107269	1.14852	0.123623	1.11535	0.12083	1.26598	0.133535	1.47722	0.153299	1.06432	0.117782	1.33439	0.13987	0.541769	0.0706559	1.23721	0.131647	1.09765	0.120535	0.968669	0.108091	1.44259	0.152731	1.15619	0.123942	1.25013	0.133985	1.47486	0.152433	1.33685	0.140242
Linear	FALSE	1.07797	0.11577	1.60144	0.162521	7.72917	0.40674	1.12819	0.123225	1.4312	0.152467	1.25434	0.135333	0.894936	0.101054	1.3173	0.140048	0.945086	0.10689	1.14244	0.123184	1.107	0.120369	1.25604	0.133017	1.46431	0.152675	1.05126	0.117243	1.32437	0.139331	0.536242	0.0703704	1.22758	0.131136	1.09106	0.120099	0.960772	0.10767	1.43315	0.152162	1.15007	0.123501	1.24043	0.133463	1.46621	0.151877	1.32762	0.139713
Data Range	E1:H335	1.34492	0.13786	1.86243	0.18016	9.62957	0.451068	1.12089	0.122713	1.42324	0.151852	1.24385	0.134722	0.888534	0.100627	1.31087	0.139497	0.940411	0.106472	1.13684	0.122699	1.0993	0.11986	1.24688	0.132444	1.45242	0.151986	1.03923	0.116648	1.31514	0.138736	0.531149	0.0700548	1.2187	0.130571	1.08499	0.119617	0.953498	0.107205	1.42445	0.151533	1.14443	0.123013	1.2315	0.132888	1.45823	0.151262	1.31911	0.139129
Filled Symbols	TRUE	0.54757	0.06959	2.14961	0.198067	11.9437	0.496793	1.1145	0.122172	1.41627	0.151203	1.23467	0.134075	0.882925	0.100177	1.30524	0.138915	0.936318	0.10603	1.13194	0.122187	1.09256	0.119321	1.23885	0.131838	1.442	0.151258	1.02869	0.11602	1.30705	0.138107	0.526688	0.0697213	1.21093	0.129975	1.07968	0.119108	0.947125	0.106713	1.41683	0.150869	1.1395	0.122499	1.22367	0.132279	1.45125	0.150613	1.31166	0.138512
ConcAge	TRUE	1.24732	0.12974	2.46559	0.216245	14.7617	0.543959	1.10925	0.121623	1.41055	0.150543	1.22714	0.133419	0.878326	0.0997196	1.30063	0.138324	0.932964	0.105581	1.12792	0.121668	1.08704	0.118775	1.23227	0.131224	1.43345	0.150518	1.02005	0.115381	1.30041	0.137469	0.523029	0.0693828	1.20455	0.129369	1.07532	0.118591	0.941899	0.106214	1.41058	0.150195	1.13545	0.121976	1.21725	0.131662	1.44553	0.149954	1.30555	0.137885
ConcSwap	FALSE	1.10461	0.11891	2.81328	0.234699	IsoLine	IsoLine	1.10536	0.121086	1.40631	0.1499	1.22155	0.132778	0.874912	0.0992731	1.29721	0.137747	0.930478	0.105144	1.12494	0.121161	1.08293	0.118242	1.22738	0.130624	1.42711	0.149796	1.01363	0.114758	1.29549	0.136846	0.520313	0.0690523	1.19982	0.128778	1.07209	0.118087	0.93802	0.105727	1.40595	0.149537	1.13245	0.121466	1.21249	0.131059	1.44128	0.14931	1.30102	0.137274
1st Symbol-row	401	0.97696	0.10652	3.19585	0.253433			1.10297	0.120583	1.40371	0.149297	1.21811	0.132178	0.872817	0.0988545	1.29511	0.137206	0.928954	0.104734	1.12312	0.120685	1.08041	0.117741	1.22438	0.130061	1.42321	0.149119	1.00968	0.114173	1.29246	0.136261	0.518645	0.0687425	1.19692	0.128223	1.0701	0.117614	0.935638	0.105271	1.4031	0.148921	1.13061	0.120988	1.20956	0.130493	1.43868	0.148707	1.29823	0.1367
		1.45253	0.15061	3.61681	0.272452			1.10218	0.120134	1.40284	0.148757	1.21696	0.13164	0.872118	0.09848	1.29442	0.136723	0.928452	0.104367	1.12251	0.12026	1.07957	0.117294	1.22338	0.129557	1.42191	0.148514	1.00836	0.11365	1.29146	0.135738	0.518088	0.0684652	1.19595	0.127727	1.06945	0.117191	0.934843	0.104862	1.40216	0.148369	1.13001	0.12056	1.20858	0.129987	1.43781	0.148167	1.29731	0.136187
		1.16267	0.1223	4.07999	0.291759			1.10301	0.119754	1.40375	0.148302	1.21815	0.131186	0.872845	0.0981639	1.29516	0.136315	0.928991	0.104057	1.12316	0.119901	1.08045	0.116916	1.22442	0.129132	1.42325	0.148002	1.00971	0.113208	1.2925	0.135297	0.518665	0.0682311	1.19695	0.127308	1.07014	0.116834	0.935668	0.104517	1.40315	0.147903	1.13066	0.120199	1.2096	0.12956	1.43872	0.147712	1.29827	0.135754
		1.26032	0.13204	4.58965	0.311359			1.10543	0.119459	1.4064	0.147948	1.22162	0.130833	0.874968	0.0979184	1.2973	0.135998	0.930551	0.103817	1.12502	0.119623	1.083	0.116623	1.22745	0.128802	1.42719	0.147605	1.01368	0.112865	1.29556	0.134954	0.520352	0.0680493	1.19989	0.126983	1.07216	0.116557	0.938078	0.104249	1.40604	0.147541	1.13253	0.119919	1.21256	0.129229	1.44137	0.147358	1.3011	0.135418
		1.48399	0.15036	5.15044	0.331256			1.10935	0.11926	1.41068	0.14771	1.22724	0.130596	0.878406	0.0977528	1.30076	0.135785	0.93307	0.103656	1.12804	0.119435	1.08713	0.116425	1.23237	0.12858	1.43357	0.147337	1.02013	0.112633	1.30052	0.134723	0.523085	0.0679266	1.20466	0.126763	1.07543	0.11637	0.941984	0.104069	1.41071	0.147297	1.13557	0.119731	1.21736	0.129005	1.44566	0.14712	1.30567	0.135191
		1.34656	0.13827	5.76748	0.351455			1.11463	0.119165	1.41644	0.147596	1.2348	0.130482	0.883028	0.0976736	1.30541	0.135684	0.936454	0.103579	1.13209	0.119346	1.09269	0.11633	1.23898	0.128473	1.44214	0.147209	1.0288	0.112522	1.30718	0.134612	0.526759	0.0678679	1.21106	0.126658	1.07982	0.116281	0.947233	0.103982	1.41699	0.147181	1.13965	0.119641	1.2238	0.128898	1.45142	0.147006	1.31181	0.135083
		0.53217	0.06806	6.44644	0.371961			1.12105	0.119178	1.42344	0.147611	1.24401	0.130496	0.888654	0.0976838	1.31107	0.135698	0.94057	0.103589	1.13702	0.119358	1.09945	0.116343	1.24703	0.128487	1.45259	0.147225	1.03936	0.112536	1.3153	0.134626	0.531232	0.0678754	1.21886	0.126672	1.08516	0.116293	0.953624	0.103993	1.42464	0.147196	1.14461	0.119653	1.23166	0.128912	1.45844	0.147021	1.31928	0.135097
		1.49571	0.15087	7.19351	0.392778			1.12836	0.119297	1.43142	0.147755	1.2545	0.130638	0.89507	0.0977831	1.31753	0.135826	0.945262	0.103687	1.14264	0.119472	1.10716	0.116461	1.25621	0.12862	1.4645	0.147385	1.0514	0.112674	1.32455	0.134765	0.536334	0.0679487	1.22775	0.126803	1.09124	0.116406	0.960913	0.104101	1.43336	0.147343	1.15027	0.119767	1.24061	0.129046	1.46643	0.147165	1.32781	0.135233
		1.14911	0.11714	8.01553	0.413911			1.1363	0.119519	1.44008	0.148021	1.26589	0.130902	0.902029	0.0979675	1.32452	0.136065	0.950349	0.103869	1.14873	0.119682	1.11552	0.116681	1.26616	0.128868	1.47742	0.147683	1.06446	0.112931	1.33459	0.135022	0.541867	0.0680852	1.23739	0.127047	1.09785	0.116615	0.968818	0.104302	1.44282	0.147615	1.1564	0.119979	1.25032	0.129295	1.4751	0.147431	1.33705	0.135485
		1.25169	0.12886	8.92002	0.435364			1.14455	0.119834	1.44908	0.1484	1.27773	0.131279	0.909263	0.09823	1.33179	0.136405	0.955636	0.104127	1.15506	0.119981	1.12422	0.116995	1.27651	0.12922	1.49085	0.148107	1.07805	0.113297	1.34502	0.135389	0.54762	0.0682794	1.24741	0.127395	1.10471	0.116912	0.977036	0.104589	1.45265	0.148002	1.16278	0.120279	1.26041	0.129649	1.48411	0.14781	1.34666	0.135845
		1.24388	0.12681	9.91526	0.457143			1.1528	0.120231	1.45808	0.148877	1.28957	0.131753	0.916493	0.0985605	1.33906	0.136833	0.960918	0.104451	1.16138	0.120357	1.13291	0.11739	1.28686	0.129665	1.50428	0.148641	1.09162	0.113758	1.35545	0.13585	0.553371	0.0685241	1.25743	0.127833	1.11157	0.117285	0.985251	0.104949	1.46247	0.148489	1.16915	0.120658	1.27051	0.130095	1.49312	0.148287	1.35627	0.136298
		1.24991	0.1314	11.0103	0.479252			1.16073	0.120695	1.46672	0.149433	1.30094	0.132307	0.923444	0.0989464	1.34604	0.137332	0.965994	0.10483	1.16746	0.120796	1.14126	0.117851	1.2968	0.130183	1.51719	0.149265	1.10468	0.114297	1.36547	0.136389	0.558898	0.0688096	1.26706	0.128344	1.11816	0.117721	0.993148	0.10537	1.47191	0.149058	1.17527	0.121099	1.28021	0.130617	1.50177	0.148843	1.3655	0.136827
		1.21285	0.12677	12.2153	0.501697			1.16803	0.121207	1.47468	0.150048	1.31143	0.132918	0.929846	0.0993727	1.35247	0.137883	0.970669	0.105248	1.17306	0.121281	1.14896	0.11836	1.30596	0.130756	1.52908	0.149954	1.11671	0.114892	1.3747	0.136984	0.563991	0.0691252	1.27594	0.128909	1.12423	0.118203	1.00042	0.105835	1.48061	0.149687	1.18091	0.121587	1.28914	0.131192	1.50975	0.149458	1.37401	0.137411
		1.54751	0.15246	13.5411	0.524482			1.17442	0.121748	1.48165	0.150697	1.32061	0.133565	0.935455	0.0998232	1.3581	0.138465	0.974762	0.10569	1.17796	0.121793	1.1557	0.118899	1.31399	0.131362	1.5395	0.150682	1.12725	0.11552	1.38279	0.137613	0.568452	0.0694587	1.28371	0.129505	1.12954	0.118712	1.00679	0.106327	1.48823	0.150351	1.18584	0.122101	1.29697	0.131801	1.51673	0.150107	1.38146	0.138028
		7.63373	0.40256	15	0.547613			1.17967	0.122297	1.48737	0.151357	1.32814	0.134221	0.940054	0.10028	1.36271	0.139056	0.978116	0.106139	1.18198	0.122312	1.16122	0.119445	1.32057	0.131976	1.54805	0.151422	1.13589	0.116159	1.38943	0.138251	0.572111	0.0697972	1.29009	0.130111	1.1339	0.119229	1.01202	0.106826	1.49448	0.151025	1.18989	0.122624	1.30339	0.132418	1.52245	0.150766	1.38757	0.138655
		1.40558	0.14606	15	0.547613			1.18356	0.122834	1.49161	0.152	1.33373	0.134862	0.943468	0.100727	1.36613	0.139633	0.980602	0.106576	1.18496	0.122819	1.16533	0.119978	1.32546	0.132576	1.55439	0.152144	1.14231	0.116782	1.39435	0.138874	0.574827	0.0701277	1.29482	0.130702	1.13713	0.119733	1.0159	0.107313	1.49911	0.151683	1.19289	0.123134	1.30815	0.133021	1.5267	0.15141	1.3921	0.139266
		1.54548	0.15348	IsoLine	IsoLine			1.18595	0.123337	1.49421	0.152603	1.33717	0.135462	0.945563	0.101145	1.36823	0.140174	0.982126	0.106986	1.18678	0.123295	1.16785	0.120479	1.32846	0.133139	1.55829	0.152821	1.14626	0.117367	1.39738	0.139459	0.576495	0.0704375	1.29772	0.131257	1.13912	0.120206	1.01828	0.107769	1.50196	0.152299	1.19473	0.123612	1.31108	0.133587	1.5293	0.152013	1.39489	0.13984
		1.41641	0.13645					1.18674	0.123786	1.49508	0.153143	1.33832	0.136	0.946262	0.10152	1.36892	0.140657	0.982628	0.107353	1.18739	0.12372	1.16869	0.120926	1.32946	0.133643	1.55959	0.153426	1.14758	0.11789	1.39838	0.139982	0.577052	0.0707148	1.29869	0.131753	1.13977	0.120629	1.01908	0.108178	1.5029	0.152851	1.19533	0.12404	1.31206	0.134093	1.53017	0.152553	1.39581	0.140353
		1.42329	0.14398					ErrEll	ErrEll	ErrEll	ErrEll	ErrEll	ErrEll	ErrEll	ErrEll	ErrEll	ErrEll	ErrEll	ErrEll	ErrEll	ErrEll	ErrEll	ErrEll	ErrEll	ErrEll	ErrEll	ErrEll	ErrEll	ErrEll	ErrEll	ErrEll	ErrEll	ErrEll	ErrEll	ErrEll	ErrEll	ErrEll	ErrEll	ErrEll	ErrEll	ErrEll	ErrEll	ErrEll	ErrEll	ErrEll	ErrEll	ErrEll	ErrEll	ErrEll
		1.47311	0.14768
		1.55211	0.15252
		1.60728	0.15746
		1.62054	0.16207
		1.64549	0.16427
		1.44413	0.1446
		1.22005	0.12323
		1.48256	0.14918
		1.40676	0.14341
		1.1988	0.12474
		1.24643	0.12983
		3.09186	0.23359
		1.67564	0.1667
		1.40411	0.14432
		1.36756	0.14229
		1.25371	0.13186
		1.54598	0.1584
		1.47641	0.15142
		1.46557	0.14451
		1.58364	0.16066
		1.60882	0.16224
		1.3519	0.13851
		1.50782	0.15113
		1.64509	0.16551
		1.4732	0.14653
		1.28398	0.12871
		1.60449	0.16205
		1.54605	0.15522
		1.57052	0.1564
		1.43756	0.14755
		1.24944	0.12831
		1.43092	0.14548
		1.43497	0.14788
		2.66353	0.21568
		1.50298	0.15064
		1.41147	0.13946
		1.44268	0.14664
		1.56175	0.15945
		1.67611	0.16632
		1.54901	0.15865
		1.56957	0.16002
		1.62522	0.16406
		1.67698	0.16419
		1.23351	0.12353
		1.54469	0.1568
		1.55505	0.15894
		1.2398	0.1247
		1.25528	0.12987
		1.48999	0.15175
		1.70294	0.16664
		1.55262	0.15153
		10.2936	0.45198
		1.5419	0.15745
		1.36384	0.14092
		1.48464	0.15414
		1.51571	0.15631
		1.32872	0.13875
		1.30403	0.13766
		1.51938	0.15632
		1.41202	0.14473
		1.51917	0.15536
		1.42681	0.14816
		1.44123	0.14971
		1.08061	0.11533
		1.50786	0.15546
		1.54524	0.15806
		1.38231	0.14444
		1.19442	0.12606
		1.55181	0.15877
		1.41637	0.14468
		1.40241	0.14527
		1.56873	0.15988
		1.1424	0.12267
		1.33315	0.14053
		1.21201	0.12701
		1.50229	0.15536
		1.30529	0.13575
		1.34863	0.14018
		1.3931	0.14639
		1.31868	0.13835
		1.48396	0.15202
		1.44696	0.14822
		1.36771	0.14086
		1.27792	0.13386
		1.3329	0.14005
		1.43846	0.1415
		1.43544	0.1447
		1.2881	0.12958
		1.494	0.15466
		1.38359	0.14526
		1.34628	0.14052
		1.07342	0.11246
		1.39653	0.14302
		1.26044	0.13418
		1.6152	0.15631
		1.04086	0.11208
		1.4121	0.14691
		1.27733	0.13405
		1.43647	0.14445
		1.1024	0.11486
		1.39721	0.14613
		1.38098	0.14371
		1.0002	0.10708
		1.42809	0.14977
		1.39355	0.14708
		1.54934	0.1573
		1.37447	0.14148
		1.15124	0.12255
		1.31862	0.13954
		0.96082	0.10126
		1.19329	0.12637
		1.48386	0.15402
		1.39165	0.14645
		1.35021	0.14346
		1.50331	0.15443
		1.293	0.13587
		1.31901	0.1394
		1.37195	0.14572
		1.43724	0.14948
		1.38738	0.14607
		1.50964	0.15416
		1.08152	0.11497
		1.23449	0.13277
		1.43348	0.14999
		2.82708	0.2348
		4.53814	0.30733
		2.81812	0.2344
		4.38453	0.29502
		2.79814	0.23385
		2.64411	0.22402
		3.67641	0.27381
		11.3955	0.46977
		2.47192	0.21152
		2.50371	0.211
		2.73161	0.22951
		2.40101	0.20785
		2.61975	0.22351
		2.62939	0.22164
		2.48322	0.20597
		2.68016	0.2234
		2.67663	0.22657
		4.11965	0.29011
		2.60176	0.21828
		2.72127	0.22845
		2.77691	0.23227
		2.94202	0.23932
		2.27091	0.19094
		2.53087	0.21041
		2.62933	0.21773
		2.43752	0.20647
		2.45669	0.20472
		2.45403	0.20315
		2.50352	0.20679
		2.70734	0.21651
		2.68029	0.22611
		2.31737	0.19876
		2.61378	0.21523
		2.65622	0.22639
		2.7509	0.2294
		2.89372	0.2317
		2.69764	0.22861
		4.29604	0.29986
		1.70494	0.15959
		2.55342	0.21999
		3.82843	0.27853
		2.60801	0.2211
		2.49586	0.21079	1.38652	0.142526	1.12867	0.114324	1.43472	0.145036	1.31212	0.136243	1.65891	0.158514	1.06892	0.113652	1.45229	0.148995	1.31189	0.135938	1.48651	0.146602	1.13076	0.116472	1.44028	0.148244	1.42108	0.145776	1.0342	0.10866	1.46659	0.151896	1.43317	0.149186	1.5925	0.159554	1.41101	0.143487	1.18221	0.124291	1.35539	0.141537	0.98309	0.102676	1.23782	0.128285	1.52686	0.156244	1.42692	0.148528
		2.46348	0.21385	1.38572	0.142942	1.1276	0.114712	1.43396	0.145455	1.3111	0.136672	1.65804	0.158971	1.06836	0.113978	1.4515	0.149428	1.3112	0.13633	1.48553	0.14705	1.13019	0.116806	1.43943	0.148683	1.42029	0.146204	1.03353	0.108988	1.46582	0.152337	1.43238	0.149622	1.59165	0.160021	1.41028	0.143903	1.18159	0.124651	1.35466	0.141951	0.982642	0.102969	1.23694	0.128683	1.526	0.156705	1.42621	0.148958
		2.29707	0.19355	1.38341	0.143265	1.12444	0.115014	1.43177	0.145779	1.30815	0.137005	1.65553	0.159326	1.06674	0.114231	1.44918	0.149764	1.30921	0.136634	1.48266	0.147397	1.12856	0.117065	1.43696	0.149024	1.41798	0.146537	1.03158	0.109243	1.4636	0.152678	1.4301	0.149961	1.58916	0.160384	1.40818	0.144226	1.17981	0.124931	1.35254	0.142272	0.981355	0.103196	1.23439	0.128993	1.52353	0.157063	1.42418	0.149292
		2.51364	0.21622	1.37967	0.143483	1.11932	0.115217	1.42822	0.145998	1.30335	0.13723	1.65147	0.159565	1.06413	0.114401	1.44545	0.14999	1.306	0.136838	1.47802	0.147631	1.12592	0.11724	1.43296	0.149253	1.41425	0.146761	1.02842	0.109415	1.46002	0.152909	1.42642	0.150189	1.58515	0.160628	1.40478	0.144443	1.17692	0.125119	1.34912	0.142489	0.979279	0.103348	1.23026	0.129201	1.51953	0.157304	1.4209	0.149516
		2.66681	0.22578	1.37465	0.143587	1.11244	0.115315	1.42345	0.146102	1.29691	0.137337	1.64601	0.159679	1.06063	0.114482	1.44043	0.150098	1.30168	0.136936	1.47178	0.147743	1.12238	0.117323	1.42758	0.149363	1.40925	0.146867	1.02418	0.109497	1.45521	0.153018	1.42147	0.150298	1.57976	0.160745	1.40022	0.144547	1.17306	0.125209	1.34453	0.142592	0.976494	0.103421	1.22471	0.129301	1.51417	0.157419	1.41649	0.149623
		2.68459	0.22487	1.36854	0.143573	1.10406	0.115303	1.41765	0.146088	1.28907	0.137323	1.63938	0.159664	1.05636	0.114471	1.43433	0.150083	1.29643	0.136922	1.46418	0.147729	1.11807	0.117311	1.42104	0.149348	1.40316	0.146853	1.01902	0.109486	1.44936	0.153003	1.41545	0.150283	1.57321	0.160729	1.39466	0.144533	1.16835	0.125196	1.33894	0.142578	0.973106	0.10341	1.21795	0.129288	1.50764	0.157404	1.41113	0.149608
		2.68107	0.22575	1.36157	0.143441	1.0945	0.115181	1.41103	0.145956	1.28013	0.137189	1.63181	0.159519	1.0515	0.114368	1.42736	0.149946	1.29044	0.136798	1.45552	0.147588	1.11315	0.117205	1.41358	0.14921	1.39621	0.146718	1.01313	0.109383	1.4427	0.152863	1.40859	0.150145	1.56573	0.160581	1.38834	0.144401	1.16299	0.125082	1.33257	0.142447	0.969246	0.103317	1.21024	0.129163	1.50019	0.157258	1.40502	0.149471
		2.12099	0.18325	1.35402	0.143198	1.08413	0.114955	1.40386	0.145711	1.27043	0.136939	1.6236	0.159252	1.04623	0.114177	1.41982	0.149693	1.28395	0.136569	1.44613	0.147327	1.10783	0.117009	1.40549	0.148953	1.38868	0.146467	1.00675	0.109191	1.43547	0.152605	1.40115	0.149889	1.55763	0.160307	1.38147	0.144157	1.15717	0.124871	1.32567	0.142204	0.965062	0.103144	1.20188	0.12893	1.49212	0.156988	1.39839	0.149218
		2.09649	0.17758	1.34616	0.142851	1.07335	0.114633	1.39641	0.145362	1.26034	0.136582	1.61507	0.158871	1.04076	0.113905	1.41197	0.149333	1.27721	0.136242	1.43636	0.146955	1.10229	0.116731	1.39709	0.148588	1.38086	0.14611	1.00011	0.108918	1.42795	0.152238	1.39342	0.149525	1.5492	0.159918	1.37434	0.14381	1.15113	0.12457	1.31849	0.141859	0.960716	0.1029	1.19319	0.128599	1.48373	0.156604	1.39151	0.148859
		2.25056	0.19471	1.33832	0.142415	1.06257	0.114228	1.38896	0.144924	1.25026	0.136134	1.60655	0.158392	1.03529	0.113563	1.40414	0.148879	1.27047	0.135832	1.4266	0.146487	1.09676	0.11638	1.38869	0.148128	1.37304	0.145661	0.993484	0.108574	1.42045	0.151776	1.38569	0.149068	1.54079	0.159428	1.36722	0.143374	1.14509	0.124192	1.31132	0.141425	0.956373	0.102592	1.18451	0.128183	1.47534	0.15612	1.38463	0.148408
		2.30735	0.19682	1.33077	0.141906	1.05221	0.113755	1.3818	0.144412	1.24058	0.13561	1.59835	0.157833	1.03003	0.113164	1.3966	0.14835	1.264	0.135353	1.41722	0.145941	1.09145	0.115971	1.38062	0.147592	1.36552	0.145137	0.987111	0.108173	1.41323	0.151236	1.37827	0.148533	1.5327	0.158856	1.36037	0.142865	1.13928	0.12375	1.30443	0.140918	0.952201	0.102233	1.17616	0.127697	1.46728	0.155556	1.37802	0.147881
		2.53879	0.21579	1.32383	0.141344	1.04266	0.113232	1.37521	0.143847	1.23165	0.135032	1.59081	0.157215	1.02519	0.112724	1.38967	0.147766	1.25803	0.134824	1.40858	0.145337	1.08656	0.11552	1.37318	0.146999	1.3586	0.144558	0.981242	0.10773	1.40659	0.150641	1.37143	0.147943	1.52525	0.158225	1.35406	0.142302	1.13394	0.123262	1.29809	0.140358	0.948361	0.101837	1.16847	0.12716	1.45986	0.154933	1.37194	0.147299
		2.58607	0.2182	1.31775	0.14075	1.0343	0.112679	1.36944	0.14325	1.22383	0.13442	1.5842	0.156563	1.02095	0.112258	1.38359	0.147149	1.25281	0.134265	1.40101	0.1447	1.08227	0.115043	1.36667	0.146373	1.35254	0.143946	0.976101	0.107262	1.40077	0.150012	1.36544	0.14732	1.51872	0.157558	1.34854	0.141708	1.12926	0.122748	1.29253	0.139767	0.944999	0.101418	1.16174	0.126592	1.45336	0.154274	1.36661	0.146685
		0.5122	0.065	1.31276	0.140147	1.02744	0.112118	1.36471	0.142645	1.21742	0.1338	1.57879	0.155901	1.01747	0.111786	1.37861	0.146522	1.24853	0.133698	1.3948	0.144052	1.07876	0.114559	1.36133	0.145738	1.34757	0.143326	0.971886	0.106787	1.39601	0.149373	1.36054	0.146688	1.51338	0.156881	1.34402	0.141106	1.12543	0.122225	1.28798	0.139168	0.942245	0.100994	1.15622	0.126016	1.44804	0.153606	1.36225	0.146061
		1.77479	0.16075	1.30906	0.139559	1.02235	0.11157	1.3612	0.142053	1.21266	0.133194	1.57477	0.155254	1.0149	0.111326	1.37492	0.14591	1.24536	0.133144	1.3902	0.14342	1.07616	0.114086	1.35737	0.145117	1.34388	0.14272	0.968759	0.106323	1.39247	0.14875	1.3569	0.146071	1.50941	0.15622	1.34066	0.140517	1.12259	0.121715	1.2846	0.138582	0.940205	0.100579	1.15212	0.125454	1.44409	0.152954	1.35901	0.145453
		2.72876	0.22813	1.30679	0.139008	1.01922	0.111056	1.35905	0.141499	1.20974	0.132626	1.57231	0.154648	1.01332	0.110894	1.37266	0.145337	1.24341	0.132626	1.38737	0.142828	1.07456	0.113644	1.35494	0.144536	1.34162	0.142152	0.96684	0.105889	1.39031	0.148166	1.35467	0.145492	1.50698	0.155601	1.33861	0.139966	1.12085	0.121237	1.28253	0.138034	0.938958	0.100191	1.1496	0.124927	1.44166	0.152343	1.35703	0.144882
		2.46014	0.21056	1.30604	0.138514	1.01817	0.110596	1.35834	0.141004	1.20876	0.132117	1.57149	0.154106	1.0128	0.110508	1.37191	0.144825	1.24277	0.132162	1.38643	0.142298	1.07404	0.113248	1.35414	0.144016	1.34088	0.141644	0.966204	0.1055	1.38959	0.147644	1.35393	0.144974	1.50618	0.155046	1.33793	0.139473	1.12027	0.120809	1.28185	0.137543	0.93855	0.0998441	1.14876	0.124455	1.44086	0.151796	1.35638	0.144372
		2.46425	0.20662	1.30684	0.138098	1.01924	0.110208	1.3591	0.140585	1.20978	0.131688	1.57236	0.153649	1.01336	0.110182	1.3727	0.144392	1.24346	0.13177	1.38741	0.14185	1.07461	0.112914	1.35499	0.143577	1.34167	0.141216	0.966874	0.105172	1.39036	0.147203	1.35472	0.144538	1.50703	0.154579	1.33866	0.139057	1.12089	0.120449	1.28258	0.137129	0.938998	0.0995514	1.14964	0.124057	1.44172	0.151335	1.35709	0.143942
		1.46671	0.15463	1.30915	0.137775	1.0224	0.109906	1.36129	0.140261	1.21273	0.131355	1.57487	0.153294	1.01498	0.109929	1.37502	0.144056	1.24545	0.131466	1.39028	0.141503	1.07624	0.112655	1.35746	0.143236	1.34398	0.140883	0.968824	0.104917	1.39258	0.146862	1.357	0.144199	1.50952	0.154216	1.34076	0.138734	1.12267	0.120169	1.2847	0.136808	0.940285	0.0993244	1.15219	0.123747	1.44419	0.150977	1.35912	0.143608
		1.37633	0.14389	1.31289	0.137557	1.02752	0.109703	1.36484	0.140042	1.21753	0.13113	1.57893	0.153055	1.01759	0.109759	1.37875	0.14383	1.24866	0.131262	1.39492	0.141269	1.07888	0.11248	1.36146	0.143007	1.34771	0.140659	0.971981	0.104745	1.39616	0.146631	1.36068	0.143971	1.51353	0.153972	1.34416	0.138517	1.12556	0.119981	1.28812	0.136591	0.942361	0.0991718	1.15632	0.123539	1.44819	0.150736	1.3624	0.143384
		1.12791	0.11703	1.31791	0.137453	1.0344	0.109605	1.36961	0.139938	1.22397	0.131023	1.58439	0.152941	1.02109	0.109678	1.38377	0.143722	1.25298	0.131164	1.40116	0.141157	1.08242	0.112397	1.36684	0.142897	1.35271	0.140553	0.976221	0.104663	1.40097	0.146522	1.36563	0.143862	1.51892	0.153855	1.34872	0.138413	1.12942	0.119891	1.29271	0.136488	0.945146	0.0990994	1.16187	0.123439	1.45355	0.150621	1.36681	0.143277
		1.09856	0.11524	1.32402	0.137467	1.04278	0.109617	1.37541	0.139952	1.23181	0.131037	1.59102	0.152956	1.02536	0.109689	1.38987	0.143737	1.25823	0.131178	1.40876	0.141171	1.08673	0.112409	1.37338	0.142912	1.3588	0.140567	0.981384	0.104674	1.40682	0.146537	1.37165	0.143877	1.52547	0.153871	1.35428	0.138427	1.13413	0.119904	1.2983	0.136502	0.948534	0.09911	1.16863	0.123452	1.46008	0.150636	1.37217	0.143292
		1.21561	0.1285	1.33099	0.137599	1.05234	0.109739	1.38203	0.140084	1.24075	0.131171	1.59859	0.153101	1.03022	0.109792	1.39684	0.143874	1.26422	0.131302	1.41742	0.141312	1.09165	0.112515	1.38084	0.14305	1.36575	0.140702	0.987269	0.104777	1.41348	0.146677	1.37851	0.144015	1.53295	0.154019	1.3606	0.138559	1.13949	0.120018	1.30467	0.136633	0.952394	0.0992033	1.17634	0.123577	1.46753	0.150782	1.37828	0.143429
		1.26458	0.13483	1.33854	0.137842	1.06271	0.109965	1.3892	0.140329	1.25045	0.131421	1.6068	0.153368	1.03549	0.109983	1.40438	0.144127	1.27071	0.131531	1.42681	0.141573	1.09697	0.112711	1.38893	0.143307	1.37328	0.140953	0.993651	0.104969	1.42071	0.146935	1.38595	0.144271	1.54105	0.154293	1.36747	0.138803	1.14531	0.120229	1.31157	0.136876	0.956578	0.0993755	1.1847	0.12381	1.4756	0.151052	1.38491	0.143682
		1.32082	0.13647	1.3464	0.138189	1.07349	0.110287	1.39665	0.140678	1.26054	0.131778	1.61533	0.153749	1.04096	0.110255	1.41223	0.144487	1.27745	0.131858	1.43658	0.141945	1.10251	0.112989	1.39733	0.143672	1.3811	0.14131	1.00029	0.105242	1.42823	0.147302	1.39368	0.144635	1.54948	0.154682	1.3746	0.13915	1.15135	0.12053	1.31875	0.137221	0.960924	0.0996203	1.19339	0.124141	1.48399	0.151436	1.39179	0.144041
		1.37087	0.13976	1.35424	0.138625	1.08427	0.110692	1.4041	0.141116	1.27062	0.132226	1.62385	0.154228	1.04643	0.110597	1.42006	0.144941	1.28419	0.132268	1.44634	0.142413	1.10804	0.11334	1.40573	0.144132	1.38892	0.141759	1.00692	0.105586	1.43573	0.147764	1.40141	0.145092	1.55789	0.155172	1.38172	0.139586	1.15739	0.120908	1.32592	0.137655	0.965267	0.099928	1.20207	0.124557	1.49238	0.15192	1.39867	0.144492
		1.27353	0.13364	1.36179	0.139134	1.09463	0.111165	1.41126	0.141628	1.2803	0.13275	1.63205	0.154787	1.05169	0.110996	1.4276	0.14547	1.29066	0.132747	1.45572	0.142959	1.11335	0.113749	1.4138	0.144668	1.39644	0.142283	1.01329	0.105987	1.44295	0.148304	1.40883	0.145627	1.56598	0.155744	1.38857	0.140095	1.1632	0.12135	1.33281	0.138162	0.969439	0.100287	1.21042	0.125043	1.50044	0.152484	1.40528	0.145019
		1.48792	0.15348	1.36873	0.139696	1.10418	0.111688	1.41785	0.142193	1.28923	0.133328	1.63959	0.155405	1.05653	0.111436	1.43453	0.146054	1.29663	0.133276	1.46436	0.143563	1.11824	0.1142	1.42124	0.145261	1.40336	0.142862	1.01916	0.10643	1.44959	0.148899	1.41567	0.146217	1.57343	0.156375	1.39488	0.140658	1.16854	0.121838	1.33915	0.138722	0.973279	0.100683	1.21811	0.12558	1.50786	0.153107	1.41136	0.145601
		1.53039	0.15402	1.37481	0.14029	1.11254	0.112241	1.42362	0.14279	1.29705	0.13394	1.6462	0.156057	1.06077	0.111902	1.44061	0.146671	1.30185	0.133835	1.47193	0.1442	1.12253	0.114677	1.42775	0.145887	1.40942	0.143474	1.0243	0.106898	1.45541	0.149528	1.42166	0.14684	1.57996	0.157042	1.4004	0.141252	1.17322	0.122352	1.34471	0.139313	0.976641	0.101102	1.22484	0.126148	1.51436	0.153766	1.41669	0.146215
		1.48557	0.15357	1.3798	0.140893	1.1194	0.112802	1.42835	0.143395	1.30346	0.13456	1.65161	0.156719	1.06425	0.112374	1.44559	0.147298	1.30613	0.134402	1.47814	0.144848	1.12604	0.115161	1.43309	0.146522	1.41439	0.144094	1.02851	0.107373	1.46017	0.150167	1.42656	0.147472	1.5853	0.157719	1.40492	0.141854	1.17705	0.122875	1.34926	0.139912	0.979395	0.101526	1.23036	0.126724	1.51968	0.154434	1.42105	0.146839
		1.44935	0.15172	1.3835	0.141481	1.12449	0.11335	1.43186	0.143987	1.30822	0.135166	1.65563	0.157366	1.06682	0.112834	1.44928	0.14791	1.3093	0.134956	1.48274	0.14548	1.12864	0.115634	1.43705	0.147143	1.41808	0.1447	1.03164	0.107837	1.46371	0.15079	1.4302	0.148089	1.58927	0.15838	1.40828	0.142443	1.17989	0.123385	1.35264	0.140498	0.981435	0.101941	1.23446	0.127286	1.52363	0.155086	1.42429	0.147447
		1.4443	0.15005	1.38577	0.142032	1.12762	0.113864	1.43401	0.144541	1.31114	0.135734	1.65809	0.157972	1.0684	0.113266	1.45154	0.148483	1.31125	0.135474	1.48557	0.146072	1.13024	0.116076	1.43948	0.147724	1.42034	0.145268	1.03356	0.108271	1.46587	0.151374	1.43243	0.148668	1.5917	0.158999	1.41033	0.142994	1.18163	0.123863	1.35471	0.141046	0.982682	0.102329	1.23698	0.127813	1.52606	0.155697	1.42627	0.148018
		1.46347	0.15037	ErrEll	ErrEll	ErrEll	ErrEll	ErrEll	ErrEll	ErrEll	ErrEll	ErrEll	ErrEll	ErrEll	ErrEll	ErrEll	ErrEll	ErrEll	ErrEll	ErrEll	ErrEll	ErrEll	ErrEll	ErrEll	ErrEll	ErrEll	ErrEll	ErrEll	ErrEll	ErrEll	ErrEll	ErrEll	ErrEll	ErrEll	ErrEll	ErrEll	ErrEll	ErrEll	ErrEll	ErrEll	ErrEll	ErrEll	ErrEll	ErrEll	ErrEll	ErrEll	ErrEll	ErrEll	ErrEll
		1.45138	0.15159
		1.3792	0.14125
		1.47186	0.15054
		1.20838	0.1225
		1.51537	0.15532
		1.47103	0.15323
		1.54048	0.15183
		1.49359	0.15421
		1.36409	0.1412
		1.46296	0.15248
		1.44459	0.15177
		1.47228	0.15246
		1.29196	0.13234
		1.4798	0.1527
		1.57582	0.16035
		1.44519	0.14747
		1.4887	0.15324
		1.41386	0.14121
		1.4758	0.15186
		1.47833	0.15189
		1.45721	0.15222
		1.47281	0.15206
		1.46559	0.15186
		1.91902	0.1788
		1.77701	0.16498
		1.90995	0.17448
		1.87938	0.17254
		1.66506	0.15961
		1.67266	0.15649
		2.02206	0.18583
		1.49256	0.14426
		1.86431	0.1729
		1.76183	0.1654
		1.93491	0.18208
		2.06321	0.19086
		1.99476	0.18343
		1.91614	0.1774
		1.89025	0.17266
		1.76163	0.16828
		1.79067	0.16563
		1.47813	0.14202
		1.86219	0.1716
		1.88481	0.17754
		1.88155	0.17855
		1.85023	0.1706
		1.87121	0.17089
		1.68008	0.15919
		1.51754	0.14238
		1.73648	0.1624
		1.98571	0.18231
		1.70721	0.16251
		1.9174	0.18118
		1.86853	0.17306
		1.6793	0.15654
		1.96608	0.1829
		1.84991	0.17245
		2.00518	0.18853
		1.89407	0.17486
		2.02083	0.18927
		1.55845	0.15078
		1.89786	0.18047
		1.98212	0.18736
		1.86594	0.17271
		1.851	0.17107
		2.02795	0.18627
		1.94062	0.18067
		1.59603	0.15144
		1.965	0.18548
		1.83886	0.175
		1.93834	0.17845
		1.76762	0.16642
		1.92981	0.17725
		1.90727	0.17033
		1.99076	0.18421
		1.40659	0.13944
		1.42828	0.13979
		1.84566	0.17354
		2.02782	0.18826
		1.25263	0.12655
		1.97545	0.18669
		1.76748	0.16575
		1.56178	0.14439
		1.7552	0.1655
		1.78137	0.17204
		1.66665	0.15334
		1.9162	0.17506
		1.66686	0.15878
		IsoLine	IsoLine
				1.45852	0.143244	1.54028	0.154218	1.52732	0.154052	1.51914	0.154539	1.5208	0.154213	1.50892	0.153964	1.97983	0.181396	1.81816	0.167224	1.97947	0.177114	1.92298	0.174893	1.72984	0.162057	1.72203	0.158712	2.07218	0.18839	1.52759	0.146228	1.92564	0.175437	1.80845	0.167702	1.97772	0.184553	2.13066	0.193673	2.03916	0.185922	1.95986	0.179823	1.96144	0.175304	1.80372	0.170594	1.83383	0.167913
				1.45764	0.143667	1.53902	0.154709	1.52636	0.154502	1.51793	0.155021	1.51986	0.15466	1.50806	0.154401	1.97864	0.181936	1.81734	0.16769	1.97811	0.177663	1.92211	0.175381	1.72857	0.162566	1.72106	0.159173	2.07118	0.188921	1.52689	0.146636	1.92443	0.175964	1.80752	0.16818	1.97687	0.185065	2.12933	0.194258	2.03828	0.186438	1.95899	0.180325	1.96005	0.175854	1.80288	0.171073	1.83298	0.168387
				1.45508	0.143995	1.53533	0.15509	1.52355	0.154851	1.51439	0.155396	1.51711	0.155007	1.50557	0.15474	1.97515	0.182355	1.81497	0.168051	1.97414	0.178089	1.91961	0.175759	1.72487	0.162962	1.71823	0.159532	2.0683	0.189333	1.52487	0.146952	1.92092	0.176374	1.80485	0.168551	1.9744	0.185463	2.12547	0.194712	2.03572	0.186839	1.95647	0.180714	1.95598	0.176282	1.80046	0.171445	1.83049	0.168754
				1.45093	0.144216	1.52936	0.155347	1.51901	0.155086	1.50865	0.155649	1.51265	0.155241	1.50155	0.154969	1.96951	0.182638	1.81114	0.168294	1.96769	0.178376	1.91555	0.176014	1.71886	0.163229	1.71365	0.159774	2.06365	0.18961	1.52161	0.147165	1.91523	0.17665	1.80052	0.168801	1.97042	0.18573	2.11921	0.195019	2.03159	0.187109	1.95241	0.180977	1.94938	0.17657	1.79654	0.171696	1.82648	0.169002
				1.44536	0.144322	1.52132	0.15547	1.5129	0.155198	1.50093	0.15577	1.50667	0.155353	1.49614	0.155078	1.96193	0.182773	1.806	0.16841	1.95903	0.178513	1.91011	0.176136	1.71079	0.163356	1.70749	0.159889	2.05739	0.189743	1.51724	0.147267	1.90759	0.176782	1.7947	0.16892	1.96507	0.185857	2.11081	0.195165	2.02604	0.187237	1.94695	0.181101	1.94051	0.176708	1.79128	0.171815	1.82109	0.16912
				1.43858	0.144308	1.51154	0.155455	1.50546	0.155184	1.49153	0.155755	1.49938	0.155339	1.48956	0.155063	1.9527	0.182755	1.79975	0.168393	1.94848	0.178496	1.90348	0.176119	1.70096	0.16334	1.69999	0.159874	2.04978	0.189725	1.51191	0.147252	1.89828	0.176765	1.78762	0.168904	1.95856	0.185839	2.10057	0.195146	2.01929	0.187219	1.9403	0.181084	1.92971	0.176691	1.78489	0.171799	1.81453	0.169104
				1.43085	0.144175	1.50038	0.155301	1.49698	0.155042	1.48082	0.155603	1.49107	0.155198	1.48206	0.154926	1.94217	0.182586	1.79262	0.168246	1.93645	0.178324	1.89593	0.175965	1.68975	0.16318	1.69145	0.159729	2.0411	0.189557	1.50585	0.147123	1.88767	0.1766	1.77955	0.168753	1.95114	0.185677	2.08889	0.194963	2.0116	0.187056	1.93273	0.180925	1.91739	0.176519	1.7776	0.171647	1.80706	0.168954
				1.42247	0.143928	1.48828	0.155015	1.48778	0.15478	1.46919	0.155322	1.48206	0.154937	1.47393	0.15467	1.93076	0.182271	1.7849	0.167973	1.9234	0.178005	1.88774	0.175679	1.67759	0.162884	1.68218	0.159459	2.03169	0.189246	1.49927	0.146884	1.87615	0.176292	1.77079	0.168474	1.9431	0.185376	2.07623	0.194621	2.00326	0.186753	1.92452	0.180631	1.90403	0.176198	1.7697	0.171366	1.79895	0.168677
				1.41375	0.143577	1.4757	0.154608	1.47822	0.154406	1.45711	0.154922	1.4727	0.154565	1.46547	0.154306	1.91889	0.181822	1.77687	0.167586	1.90983	0.17755	1.87923	0.175272	1.66495	0.162461	1.67254	0.159075	2.02191	0.188804	1.49243	0.146544	1.86419	0.175854	1.7617	0.168076	1.93474	0.184949	2.06307	0.194135	1.9946	0.186322	1.91598	0.180212	1.89014	0.175741	1.76148	0.170966	1.79053	0.168282
				1.40504	0.143134	1.46312	0.154095	1.46866	0.153936	1.44503	0.154418	1.46334	0.154097	1.45702	0.153849	1.90703	0.181258	1.76884	0.167098	1.89627	0.176977	1.87073	0.174761	1.65232	0.161929	1.66291	0.158592	2.01213	0.188248	1.4856	0.146116	1.85223	0.175302	1.75261	0.167575	1.9264	0.184411	2.04992	0.193524	1.98594	0.18578	1.90746	0.179685	1.87625	0.175166	1.75327	0.170463	1.78211	0.167786
				1.39667	0.142618	1.45103	0.153496	1.45948	0.153387	1.43342	0.153829	1.45434	0.15355	1.4489	0.153315	1.89563	0.180599	1.76113	0.166528	1.88324	0.176308	1.86256	0.174164	1.64017	0.161308	1.65366	0.158028	2.00274	0.187598	1.47904	0.145617	1.84073	0.174658	1.74387	0.166991	1.91837	0.183784	2.03727	0.19281	1.97762	0.185148	1.89926	0.179071	1.8629	0.174495	1.74539	0.169876	1.77402	0.167206
				1.38896	0.142048	1.43989	0.152835	1.45102	0.152781	1.42272	0.153178	1.44605	0.152947	1.44142	0.152725	1.88513	0.179871	1.75403	0.1659	1.87123	0.175569	1.85503	0.173504	1.62898	0.160621	1.64513	0.157405	1.99409	0.186881	1.47299	0.145066	1.83014	0.173947	1.73582	0.166346	1.91099	0.183091	2.02562	0.192021	1.96996	0.18445	1.89172	0.178392	1.8506	0.173753	1.73813	0.169228	1.76657	0.166567
				1.3822	0.141445	1.43014	0.152136	1.44361	0.15214	1.41335	0.152491	1.43879	0.152309	1.43487	0.152102	1.87593	0.179101	1.74781	0.165235	1.86071	0.174788	1.84845	0.172808	1.61918	0.159896	1.63767	0.156747	1.98652	0.186123	1.4677	0.144483	1.82086	0.173195	1.72877	0.165664	1.90452	0.18236	2.01542	0.191187	1.96325	0.183713	1.88511	0.177675	1.83983	0.172969	1.73177	0.168543	1.76005	0.165891
				1.37667	0.140833	1.42213	0.151426	1.43753	0.15149	1.40566	0.151793	1.43284	0.151662	1.4295	0.15147	1.86839	0.17832	1.74272	0.164562	1.85208	0.173995	1.84305	0.172101	1.61114	0.159159	1.63154	0.156079	1.98031	0.185354	1.46337	0.143893	1.81325	0.172432	1.723	0.164973	1.89922	0.181618	2.00705	0.190341	1.95775	0.182965	1.8797	0.176948	1.83099	0.172173	1.72655	0.167848	1.7547	0.165205
				1.37256	0.140236	1.41619	0.150733	1.43302	0.150855	1.39995	0.151112	1.42843	0.15103	1.42551	0.150852	1.86279	0.177558	1.73894	0.163904	1.84567	0.173221	1.83904	0.171412	1.60517	0.15844	1.627	0.155427	1.9757	0.184603	1.46015	0.143316	1.8076	0.171687	1.71871	0.164297	1.89529	0.180893	2.00084	0.189514	1.95367	0.182234	1.87569	0.176238	1.82444	0.171396	1.72269	0.16717	1.75074	0.164535
				1.37004	0.139677	1.41254	0.150084	1.43026	0.15026	1.39645	0.150473	1.42572	0.150437	1.42307	0.150274	1.85935	0.176843	1.73663	0.163287	1.84174	0.172495	1.83659	0.170765	1.6015	0.157766	1.62421	0.154815	1.97288	0.1839	1.45818	0.142775	1.80414	0.170988	1.71608	0.163664	1.89289	0.180214	1.99703	0.18874	1.95118	0.18155	1.87323	0.175573	1.82041	0.170668	1.72032	0.166535	1.74831	0.163908
				1.3692	0.139176	1.41132	0.149502	1.42934	0.149728	1.39528	0.149901	1.42482	0.149907	1.42226	0.149756	1.85821	0.176204	1.73586	0.162736	1.84043	0.171846	1.83578	0.170187	1.60028	0.157163	1.62329	0.154268	1.97194	0.18327	1.45753	0.142292	1.80298	0.170363	1.71521	0.163098	1.8921	0.179607	1.99576	0.188047	1.95036	0.180938	1.87242	0.174977	1.81906	0.170016	1.71954	0.165966	1.74751	0.163347
				1.37008	0.138753	1.41258	0.149011	1.4303	0.149278	1.39649	0.149419	1.42576	0.14946	1.42312	0.149319	1.8594	0.175664	1.73668	0.16227	1.84179	0.171297	1.83665	0.169699	1.60155	0.156654	1.62426	0.153807	1.97294	0.182739	1.45823	0.141884	1.80419	0.169836	1.71614	0.16262	1.89295	0.179095	1.99709	0.187462	1.95124	0.180422	1.87329	0.174475	1.82045	0.169466	1.72038	0.165487	1.74836	0.162873
				1.37264	0.138425	1.41627	0.14863	1.43311	0.148929	1.40003	0.149044	1.42851	0.149113	1.42561	0.14898	1.86289	0.175245	1.73905	0.161909	1.84576	0.170871	1.83915	0.169321	1.60525	0.156258	1.62709	0.153448	1.97582	0.182327	1.46025	0.141568	1.8077	0.169426	1.71881	0.162249	1.89542	0.178697	2.00095	0.187008	1.9538	0.180021	1.87581	0.174086	1.82452	0.169038	1.7228	0.165115	1.75085	0.162506
				1.37679	0.138204	1.42224	0.148373	1.43765	0.148694	1.40577	0.148791	1.43297	0.148879	1.42963	0.148751	1.86853	0.174962	1.74288	0.161666	1.85221	0.170584	1.84321	0.169066	1.61126	0.155991	1.63167	0.153206	1.98047	0.18205	1.46351	0.141355	1.81339	0.16915	1.72314	0.161999	1.8994	0.17843	2.00721	0.186701	1.95793	0.179751	1.87987	0.173823	1.83112	0.16875	1.72672	0.164864	1.75486	0.162258
				1.38236	0.138098	1.43028	0.14825	1.44376	0.148582	1.41349	0.14867	1.43895	0.148767	1.43504	0.148642	1.87611	0.174827	1.74802	0.16155	1.86087	0.170447	1.84865	0.168944	1.61933	0.155864	1.63783	0.153091	1.98673	0.181917	1.46788	0.141253	1.82103	0.169018	1.72896	0.16188	1.90475	0.178303	2.01561	0.186555	1.96348	0.179623	1.88533	0.173699	1.83999	0.168612	1.73198	0.164745	1.76025	0.16214
				1.38914	0.138112	1.44006	0.148265	1.4512	0.148596	1.42289	0.148685	1.44624	0.148781	1.44162	0.148657	1.88534	0.174845	1.75427	0.161567	1.87142	0.170464	1.85528	0.168961	1.62916	0.15588	1.64533	0.153106	1.99434	0.181935	1.47321	0.141268	1.83034	0.169035	1.73604	0.161896	1.91126	0.178321	2.02585	0.186574	1.97023	0.179641	1.89198	0.173716	1.85079	0.168629	1.73837	0.164761	1.76681	0.162156
				1.39687	0.138245	1.45122	0.148419	1.45968	0.148738	1.4336	0.148837	1.45455	0.148922	1.44912	0.148794	1.89587	0.175014	1.7614	0.161714	1.88345	0.170636	1.86283	0.169115	1.64037	0.15604	1.65387	0.153251	2.00302	0.182103	1.47927	0.141397	1.84095	0.1692	1.74411	0.162047	1.91868	0.178483	2.03753	0.186757	1.97792	0.179804	1.89955	0.173875	1.86311	0.168801	1.74566	0.164913	1.77428	0.162306
				1.40525	0.138492	1.46332	0.148705	1.46888	0.149	1.44523	0.149118	1.46356	0.149183	1.45725	0.14905	1.90728	0.175329	1.76912	0.161987	1.8965	0.170955	1.87102	0.169401	1.65253	0.156336	1.66314	0.153521	2.01243	0.182414	1.48585	0.141636	1.85247	0.169508	1.75287	0.162326	1.92672	0.178784	2.05019	0.187099	1.98626	0.180107	1.90776	0.174169	1.87647	0.169122	1.75356	0.165194	1.78239	0.162583
				1.41397	0.138843	1.4759	0.149112	1.47844	0.149374	1.45731	0.149518	1.47292	0.149555	1.46571	0.149414	1.91915	0.175778	1.77715	0.162374	1.91007	0.17141	1.87953	0.169808	1.66517	0.156759	1.67278	0.153905	2.02221	0.182856	1.49269	0.141976	1.86443	0.169946	1.76196	0.162724	1.93508	0.179211	2.06335	0.187585	1.99492	0.180538	1.9163	0.174588	1.89036	0.169579	1.76178	0.165594	1.79081	0.162978
				1.42268	0.139286	1.48848	0.149625	1.488	0.149844	1.46939	0.150022	1.48228	0.150023	1.47416	0.149871	1.93101	0.176342	1.78518	0.162862	1.92363	0.171983	1.88803	0.170319	1.6778	0.157291	1.68241	0.154388	2.03199	0.183412	1.49952	0.142404	1.87639	0.170498	1.77105	0.163225	1.94342	0.179749	2.0765	0.188196	2.00358	0.18108	1.92482	0.175115	1.90425	0.170154	1.76999	0.166097	1.79923	0.163474
				1.43105	0.139802	1.50057	0.150224	1.49718	0.150393	1.481	0.150611	1.49128	0.15057	1.48228	0.150405	1.94241	0.177001	1.79289	0.163432	1.93666	0.172652	1.8962	0.170916	1.68995	0.157912	1.69166	0.154952	2.04138	0.184062	1.50608	0.142903	1.88789	0.171142	1.77979	0.163809	1.95145	0.180376	2.08915	0.18891	2.0119	0.181712	1.93302	0.175729	1.9176	0.170825	1.77787	0.166684	1.80732	0.164054
				1.43876	0.140372	1.51171	0.150885	1.50564	0.150999	1.4917	0.151262	1.49957	0.151173	1.48976	0.150995	1.95291	0.177729	1.79999	0.16406	1.94867	0.173391	1.90373	0.171576	1.70114	0.158599	1.70019	0.155575	2.05003	0.184779	1.51213	0.143454	1.89848	0.171853	1.78784	0.164454	1.95883	0.181069	2.1008	0.189699	2.01956	0.18241	1.94056	0.176408	1.9299	0.171567	1.78513	0.167332	1.81477	0.164693
				1.44552	0.140975	1.52146	0.151584	1.51305	0.15164	1.50107	0.151949	1.50683	0.151811	1.49631	0.151618	1.96211	0.178499	1.80621	0.164725	1.95919	0.174172	1.91031	0.172272	1.71094	0.159324	1.70765	0.156233	2.0576	0.185537	1.51742	0.144037	1.90776	0.172605	1.79489	0.165136	1.9653	0.1818	2.111	0.190533	2.02627	0.183147	1.94717	0.177125	1.94067	0.172351	1.79149	0.168017	1.82129	0.165369
				1.45105	0.141587	1.52947	0.152294	1.51913	0.15229	1.50876	0.152647	1.51278	0.152458	1.50168	0.15225	1.96965	0.17928	1.8113	0.165398	1.96782	0.174965	1.91571	0.172979	1.71898	0.160061	1.71378	0.156901	2.06381	0.186306	1.52175	0.144627	1.91537	0.173368	1.80066	0.165827	1.9706	0.182542	2.11937	0.191379	2.03177	0.183895	1.95258	0.177852	1.94951	0.173147	1.79671	0.168712	1.82664	0.166055
				1.45516	0.142184	1.53541	0.152987	1.52364	0.152925	1.51447	0.153328	1.51719	0.15309	1.50567	0.152868	1.97525	0.180042	1.81508	0.166056	1.97423	0.175739	1.91972	0.173668	1.72495	0.16078	1.71832	0.157553	2.06842	0.187057	1.52497	0.145204	1.92102	0.174113	1.80495	0.166503	1.97453	0.183267	2.12558	0.192206	2.03585	0.184626	1.95659	0.178562	1.95606	0.173924	1.80057	0.16939	1.8306	0.166725
				1.45768	0.142743	1.53906	0.153636	1.5264	0.15352	1.51797	0.153967	1.5199	0.153683	1.50811	0.153446	1.97869	0.180757	1.81739	0.166673	1.97816	0.176465	1.92217	0.174315	1.72862	0.161454	1.72111	0.158165	2.07124	0.18776	1.52694	0.145745	1.92448	0.174812	1.80758	0.167136	1.97693	0.183946	2.12939	0.19298	2.03834	0.18531	1.95905	0.179227	1.96009	0.174652	1.80294	0.170025	1.83303	0.167352
				ErrEll	ErrEll	ErrEll	ErrEll	ErrEll	ErrEll	ErrEll	ErrEll	ErrEll	ErrEll	ErrEll	ErrEll	ErrEll	ErrEll	ErrEll	ErrEll	ErrEll	ErrEll	ErrEll	ErrEll	ErrEll	ErrEll	ErrEll	ErrEll	ErrEll	ErrEll	ErrEll	ErrEll	ErrEll	ErrEll	ErrEll	ErrEll	ErrEll	ErrEll	ErrEll	ErrEll	ErrEll	ErrEll	ErrEll	ErrEll	ErrEll	ErrEll	ErrEll	ErrEll	ErrEll	ErrEll
[truncated: 206 more columns]

## Sheet: Sheet1
Table 1 LA-ICP MS U-Th-Pb data on zircons from the diabase in the East Kunlun Orogenic Belt
	Pb*	Th	U	Th/U	Isotope ratios								Ages
		Th	U		Pb207/Pb206	1σ	Pb207/U235	1σ	Pb206/U238	1σ	Pb208/Th232	1σ	Pb207/Pb206	1σ	Pb207/U235	1σ	Pb206/U238	1σ	Pb208/Th232	1σ
QMT-113-01	19.3329	151.02	265.36	0.569114	0.05586	0.00183	0.52896	0.01031	0.06867	0.00105	0.02041	0.0003	446.3	71.38	431.1	6.85	428.1	6.34	408.3	5.85
QMT-113-02	33.8517	314.45	410.75	0.765551	0.05592	0.00183	0.52132	0.01003	0.0676	0.00103	0.01974	0.00028	448.9	71.05	426	6.7	421.7	6.24	395.1	5.49
QMT-113-03	16.8391	136.64	226.9	0.602204	0.0547	0.00185	0.51545	0.01085	0.06833	0.00106	0.02055	0.00031	400.1	73.09	422.1	7.27	426.1	6.37	411.1	6.13
QMT-113-04	19.95	161.69	265.2	0.609691	0.05469	0.00184	0.51376	0.01071	0.06811	0.00105	0.02034	0.0003	400.1	72.54	421	7.19	424.8	6.34	407	5.96
QMT-113-06	12.4874	82.68	185.14	0.446581	0.05863	0.00206	0.55005	0.01274	0.06803	0.00107	0.02054	0.00035	553.5	74.95	445	8.34	424.3	6.44	410.9	6.97
QMT-113-07	36.9714	326.72	453.03	0.721188	0.05492	0.00175	0.51117	0.00922	0.06749	0.00103	0.01975	0.00027	409	69.11	419.2	6.19	421	6.19	395.3	5.29
QMT-113-08	22.4184	168.67	298.56	0.564945	0.06167	0.00201	0.57714	0.01106	0.06786	0.00104	0.02184	0.00031	662.7	68.27	462.6	7.12	423.3	6.28	436.7	6.17
QMT-113-09	25.1492	210.48	328.26	0.641199	0.05514	0.00179	0.51622	0.00985	0.06789	0.00104	0.01948	0.00027	417.6	70.49	422.6	6.6	423.5	6.26	389.9	5.43
QMT-113-10	19.4737	160.44	252.88	0.634451	0.05509	0.00181	0.51197	0.01014	0.06739	0.00103	0.02017	0.00029	415.7	71.41	419.8	6.81	420.4	6.24	403.6	5.74
QMT-113-11	11.7588	90.3	168.64	0.53546	0.05718	0.00204	0.52195	0.01252	0.0662	0.00104	0.02012	0.00033	497.9	77.31	426.5	8.35	413.2	6.3	402.5	6.55
QMT-113-12	14.4547	99.11	192.87	0.513869	0.05316	0.00197	0.50277	0.01307	0.06858	0.00109	0.0201	0.00035	335.6	81.89	413.6	8.83	427.6	6.59	402.2	6.89
QMT-113-13	17.8357	144.51	235.49	0.613657	0.05286	0.00176	0.48868	0.01006	0.06705	0.00103	0.01947	0.00028	322.5	74.13	404	6.86	418.4	6.23	389.7	5.64
QMT-113-14	22.3826	176.36	282.06	0.625257	0.05575	0.0018	0.51824	0.00984	0.06742	0.00103	0.01994	0.00028	441.9	70.4	424	6.58	420.6	6.22	399	5.53
QMT-113-15	39.3813	353.85	471	0.751274	0.05482	0.00174	0.51031	0.00909	0.06751	0.00103	0.01959	0.00026	404.9	68.66	418.7	6.11	421.1	6.19	392.1	5.18
QMT-113-16	35.1889	324.5	431.5	0.752028	0.0544	0.00173	0.50597	0.00912	0.06746	0.00103	0.0192	0.00026	387.4	69.5	415.7	6.15	420.8	6.19	384.4	5.11
QMT-113-17	20.0011	168.82	269.43	0.626582	0.05494	0.00178	0.51291	0.00983	0.0677	0.00104	0.01974	0.00027	409.9	70.36	420.4	6.6	422.3	6.25	395.1	5.44
QMT-113-19	21.962	191.6	286.52	0.668714	0.05474	0.0018	0.50389	0.00997	0.06676	0.00102	0.01942	0.00027	401.7	71.15	414.3	6.73	416.6	6.19	388.8	5.4
QMT-113-20	32.9192	299.59	421.38	0.710973	0.05393	0.00172	0.50128	0.00917	0.06741	0.00103	0.01883	0.00025	367.9	70.16	412.6	6.2	420.6	6.2	377.1	4.99
QMT-113-21	29.3625	252.46	358.9	0.703427	0.05554	0.00186	0.5196	0.01083	0.06785	0.00105	0.0192	0.00028	433.7	72.74	424.9	7.24	423.2	6.33	384.3	5.54
QMT-113-23	26.6902	236.23	341.13	0.692493	0.05463	0.00174	0.50953	0.0093	0.06765	0.00103	0.01908	0.00026	397	69.09	418.1	6.25	422	6.22	382	5.06
QMT-113-24	22.5229	192.08	293.47	0.654513	0.05731	0.00186	0.54012	0.01046	0.06835	0.00105	0.0198	0.00028	503	70.49	438.5	6.89	426.2	6.33	396.4	5.51
QMT-113-25	11.2705	90.64	162.52	0.557716	0.05684	0.0021	0.52672	0.0137	0.06721	0.00107	0.01991	0.00034	484.6	80.33	429.6	9.11	419.3	6.49	398.5	6.74
QMT-113-27	24.3818	214.62	305.72	0.702015	0.06212	0.00205	0.58055	0.01175	0.06779	0.00105	0.01985	0.00028	678.2	69.07	464.8	7.55	422.8	6.33	397.3	5.5
QMT-113-28	23.7892	200.91	294.41	0.682416	0.05716	0.00201	0.54748	0.01287	0.06947	0.00109	0.02032	0.00031	497.2	76.28	443.3	8.45	433	6.6	406.5	6.21
QMT-113-29	11.9754	47.21	188.51	0.250438	0.05522	0.00203	0.50695	0.01298	0.06659	0.00106	0.02341	0.00057	421.1	79.54	416.4	8.75	415.6	6.41	467.8	11.28
QMT-113-30	21.7389	164.14	286.47	0.572974	0.05535	0.00179	0.5162	0.00996	0.06764	0.00104	0.01906	0.00027	426.2	70.38	422.6	6.67	422	6.26	381.7	5.29
QMT-113-31	9.28262	81.77	145.46	0.562148	0.05286	0.00187	0.48858	0.01169	0.06704	0.00105	0.01859	0.0003	322.7	78.62	403.9	7.97	418.3	6.37	372.4	5.95
QMT-113-32	11.8709	102.8	173.96	0.59094	0.0548	0.00191	0.51076	0.01181	0.0676	0.00106	0.01929	0.0003	404.2	75.58	419	7.93	421.7	6.4	386.3	5.97
QMT-113-33	16.9202	130.16	227.15	0.573013	0.05999	0.002	0.56067	0.01169	0.06779	0.00105	0.02011	0.0003	603.2	70.64	452	7.61	422.8	6.35	402.5	5.89
QMT-113-34	27.1645	236.09	342.28	0.689757	0.05339	0.00172	0.49565	0.00947	0.06734	0.00103	0.01866	0.00025	345.3	71.31	408.8	6.43	420.1	6.23	373.6	5.04
QMT-113-35	12.8024	106.29	185.81	0.572036	0.05868	0.00201	0.53775	0.01196	0.06647	0.00104	0.01873	0.00029	555.3	73.07	436.9	7.9	414.9	6.28	375.1	5.72
QMT-113-36	14.0713	129.22	204.67	0.631358	0.05781	0.00242	0.52648	0.01708	0.06606	0.00111	0.01893	0.00041	522.3	89.55	429.5	11.36	412.4	6.73	379	8.12
